# Supplementary material for: Insights into the effect of Pt doping of Cu(110)/H2O for methanol decomposition: a density functional theory study
Source: Royal Society of Chemistry journal article supplement (doi:10.1039/c6ra09395g), 2016-01-01
Supplement: c6ra09395g1.pdf [file c6ra09395g1.pdf]

## Supporting Information

### Insights into the effect of Pt dopant into Cu(110)/H<sub>2</sub>O for methanol

#### decomposition: A density functional theory study

Yong-Chao Zhang, Zhi-Jun Zuo, Rui-Peng Ren \* and Yong-Kang Lv\*

Key Laboratory of Coal Science and Technology of Ministry of Education and Shanxi Province,

Taiyuan University of Technology, Taiyuan 030024, Shanxi China

\*Corresponding author. Fax: +86 351 6010386. E-mail address: lykang@tyut.edu.cn (Y.-K. Lv);

renruiPeng888@126.com (R.-P. Ren).

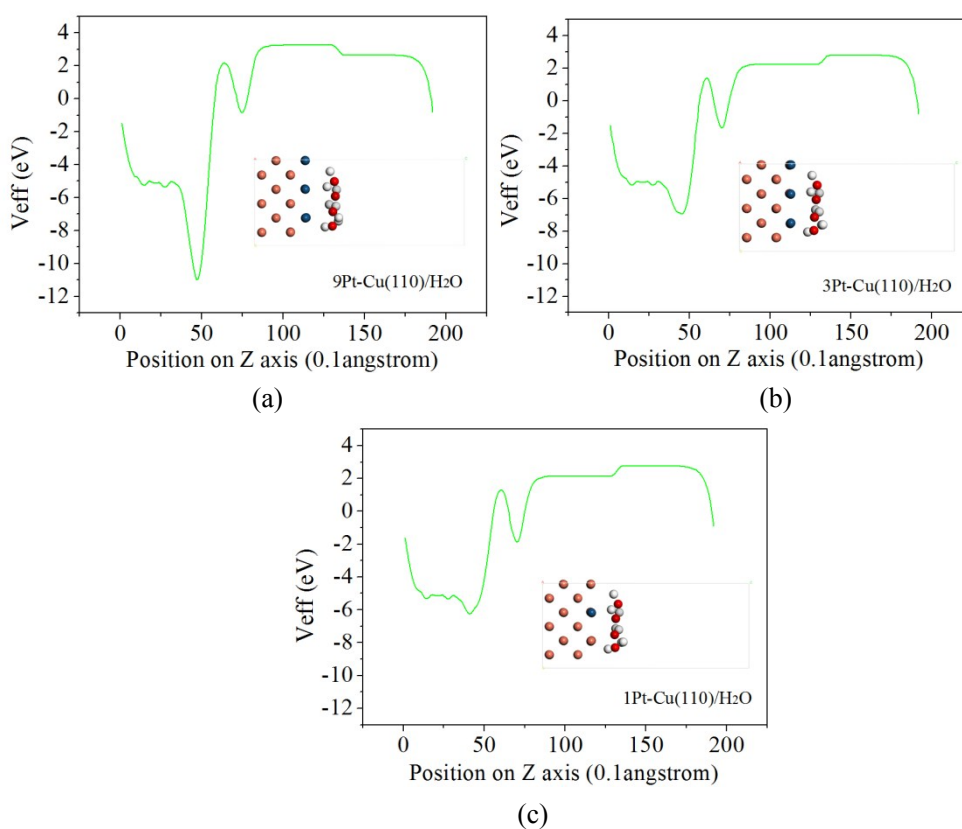

**Fig.S1** The average electrostatic potential through the slab of the Z axis direction, (a) 9Pt-Cu(110)/H<sub>2</sub>O, (b) 3Pt-Cu(110)/H<sub>2</sub>O and (c) 1Pt-Cu(110)/H<sub>2</sub>O.

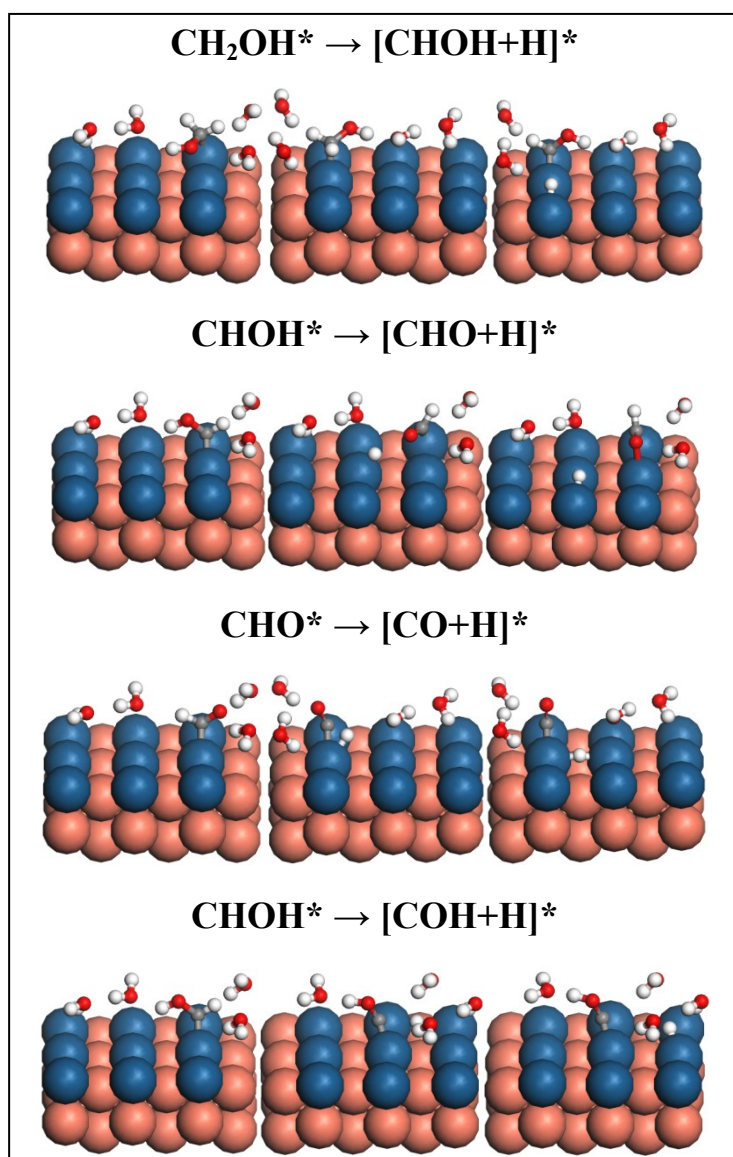

**Fig.S2** Schematic representation of the C-H bond breaking route of CHOH for the methanol decomposition on 9Pt-Cu(110)/H<sub>2</sub>O surface. Cu, Pt, C, O and H atoms are shown in brown, blue, gray, red and white spheres, respectively.

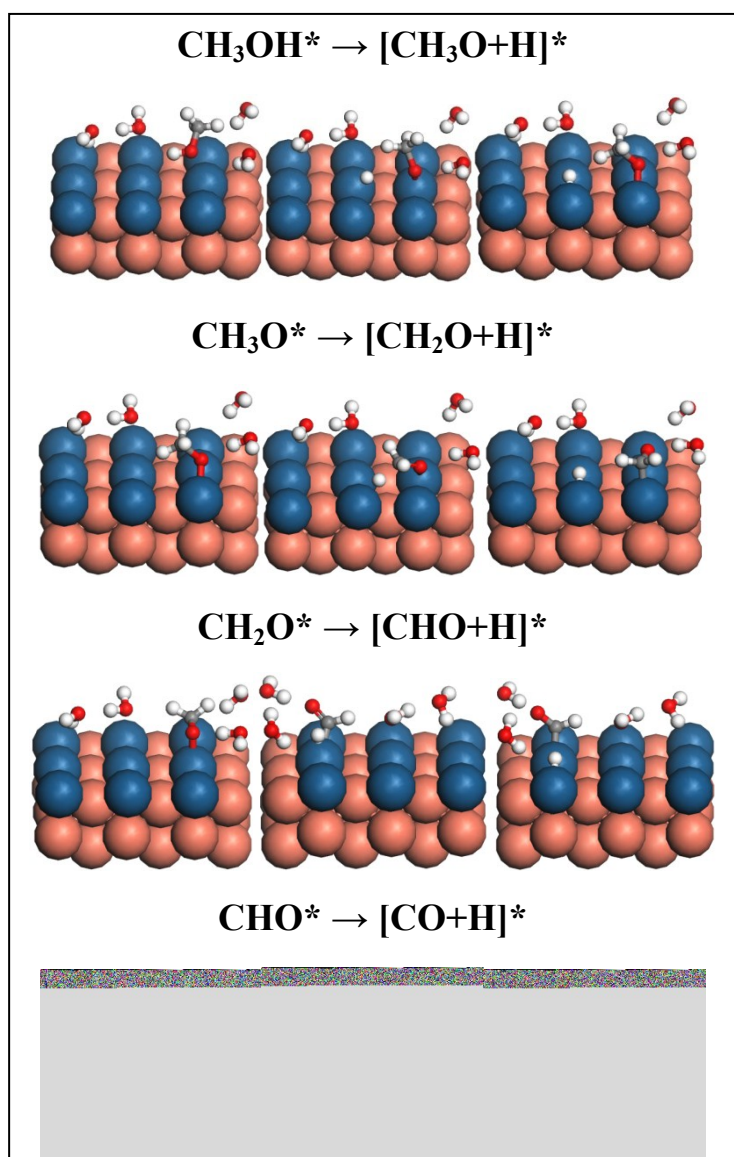

**Fig.S3** Schematic representation of the O-H bond breaking route for the methanol decomposition on 9Pt-Cu(110)/H<sub>2</sub>O surface. See Fig.S2 for color coding.

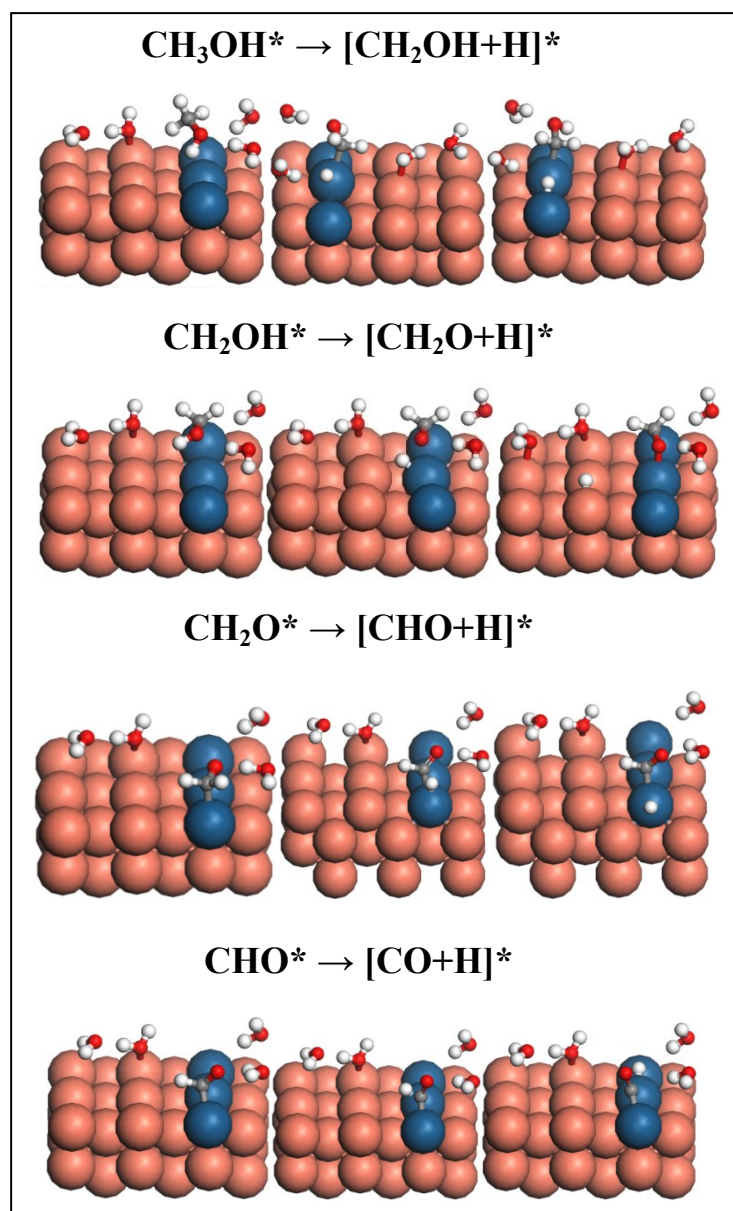

**Fig.S4** Schematic representation of the C-H bond breaking route for the methanol decomposition on 3Pt-Cu(110)/H<sub>2</sub>O surface. See Fig.S2 for color coding.

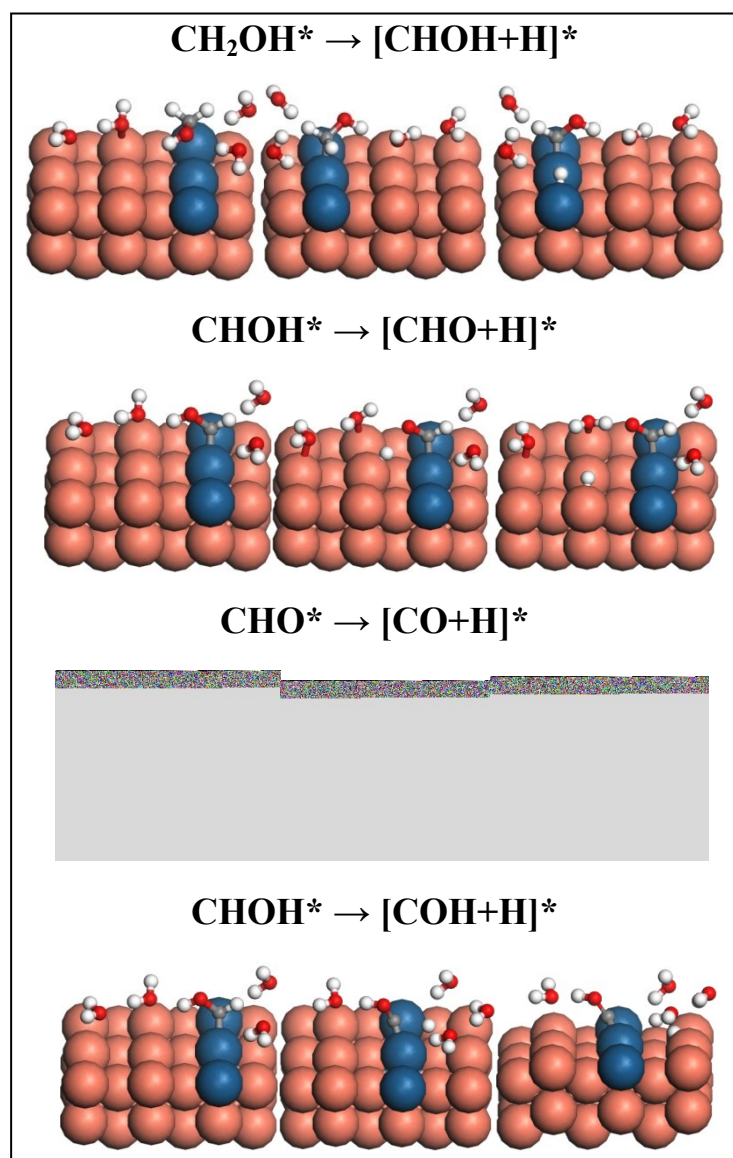

**Fig.S5** Schematic representation of the C-H bond breaking route of CHOH for the methanol decomposition on 3Pt-Cu(110)/H<sub>2</sub>O surface. See Fig.S2 for color coding.

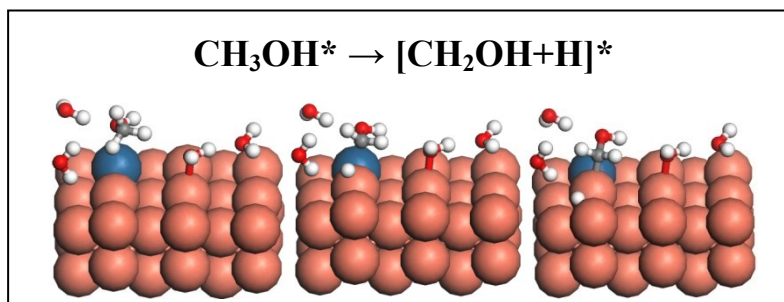

**Fig.S6** Schematic representation of the C-H bond breaking route for the methanol decomposition on 1Pt-Cu(110)/H<sub>2</sub>O surface. See Fig.S2 for color coding.
